# Supplementary material for: Aerobic Denitrification and Heterotrophic Sulfur Oxidation in the Genus Halomonas Revealed by Six Novel Species Characterizations and Genome-Based Analysis
Source: Front Microbiol. 2021 Mar 18;12:652766. doi: 10.3389/fmicb.2021.652766 (PMC8014003; doi:10.3389/fmicb.2021.652766)
Supplement: Supplementary file 7 [file Table_6.xlsx]

## Sheet: Table S6
Table S6. Query gene sequences used for the BLASTP search analysis in nitrogen, sulfur and carbon metabolism as well as stress response.
	query genes	UniProt/SwissProt annotation	query sequences
nap operon	napA	Periplasmic nitrate reductase, catalytic subunit	MKLTRRDFIRNSAVATATTAAGMTTATQAQNIVTDAQHTQLKWAKAPCRFCGVGCGVNVAVRDNRVVATHGDMQSPVNRGINCIKGYFLSKIMYGEDRLTQPLLRKRNGEYHKEGEFTPVSWDEAFDVMAEKYKAALRDKGPSAIGMFGSGQWTIWEGYTANKLMKAGFRSNHLDPNARHCMASAVFGFMRTFGIDEPMGCYEDIEAADAFVLWGANMAEMHPILWTRITDRRLSNPHVRVSVLSTFEHRSFELADQPIIFTPQADLAILNYVARYIIENDRVNWDFVNENVRFMEGNVDIGYGLRPEHRLELAAANAADTGGARDIDFERYREFLQQYDAETVTRLSGVPKRQLDALAELYADPDTKVMSFWTMGFNQHTRGVWANNMIYNIHLLTGK…
	napB	Periplasmic nitrate reductase, electron transfer subunit	MRLVTILSCLAAFMLPTLQGLAAEGELDPLRANAPLLEEREPEPLYGVEDRSLRPVREYPMQPPTIPHRIDNYQVDLNANRCMACHARTRVGETQAIMVSVTHYMDREGNFLGDLSPRRYFCTQCHVPQTDAPSRVGNTFVDMSDLIRGSRQRSE
	napC	Cytochrome c-type protein NapC	MFKRIGSFLRSFWRVFRSPSGYFSLGFLTVGGFIGGVLFWGGFNTAMEATNTERFCISCHEMESNVYQEILPTIHYTNRSGVRAVCSDCHVPHNWTDKIARKMQASKEVWGHIFGVIDTREKFLDHRLEMASREWRRFEANDSLECRNCHDEQYMDFTRQSPRAAAAHQRGLVEGDATCITCHKGIAHELPDMAGVHGWE
	napD	NapA signal peptide-binding chaperone NapD	MDDKVHISSLVVQAQPQHVDSLKKQCSAHDGVEVPVIDPLGKLVVLLELPSQRHIVEFIDWLQERAGVLSVSMVYHHMESTQELEREVQGHEADSA
	napE	Protein NapE	MMSELEFGLRKTSLLPTVVQDVSLWCRFMQRTIDKPSRKRKPQTPEEQQEKKRELLVFLFLAGILFPILAVLVVSGYGFAVWIFQIFAGPPGPPG
	napF	Ferredoxin-type protein NapF	MSAVDASRRALLKGRVRHEPAIRPPWAVPEPSFIEHCTRCGECLKACETQIIRQGDGGYPEVDFSRGECTFCRACAEACPEPAFSRNEHSPPWNLSARIVDGCLGEQGVYCKSCGEVCEVGAIRFSFNAFRVPEPDVDSEACNGCGACVALCPVQVVEVMPAIEATS
	napG	Ferredoxin-type protein NapG	MAGTACGAALVGMGVGLYSRSAAPLAPHALRPPGALAEADFLSACVRCGLCVRDCPFDTLRLAELGDPAAPTGTPYFVAREIPCEMCDPIYCVEACPTEALDPALTDIDEARMGLAVVVDQETCLAFQGLRCEVCFNVCPVRGEAITLEQRHNLRTGQHSQFVPVVHSTACTGCGKCEHACITEEAAIKVLPLSLAKGGLGEHYRFGLDEKERAGESLLAPDEQHRYHLPEGVDYQLDDGGLMPRGEPPAEPYGDDALDTLNRGLESGDG
	napH	Ferredoxin-type protein NapH	MARQERPGRRMARERGWWPAHRFLVLRRLTQASVLGLFLLGPLAGWWIVKGNLASSLTLGVLPLSDPYLLVQSLAAGHAVGVTAWVGALIVLSAYLLLGGRVYCAWVCPINAVTDTAAWLRRRLGITHTAKFSRSTRYWLLAATLAMALVTGSLAWEWVNPVSIVFRSLVFGIGLAWGVIVAIFLFDLLVARRGWCSHLCPMGAFYSLPGHLALLRVNAGGRERCDDCMDCYAVCPEPQVISPALKPRDESASAVIRSAQCTNCARCIDVCSQDVFAFGSRFVATEPTRDRHKREIAP
nar operon	narG	Respiratory nitrate reductase alpha chain	MSHFLDRLNFFRKAREPFANDHGETREESRGWEDGYRQRWQHDKIVRSTHGVNCTGSCSWKIYVKNGLVTWETQQTDYPRTRPDLPNHEPRGCPRGASYSWYMYSANRLKYPLIRKPLLKLWREAKQQHGDPVDAWASIVSDPAKTKQYKRARGMGGFVRANWDELNELIAASNVYTAKQYGPDRIIGFSPIPAMSMVSYAAGSRYLSLIGGVCMSFYDWYCDLPPASPQTWGEQTDVPESADWYNSGYIIAWGSNVPQTRTPDAHFFTEVRYKGTKTVSITPDYAEVSKLTDEWLSVKQGTDAALGMAMGHVILKEFHLDKPSAYFTEYVRKYSDMPFLVELEAREDGSFVPGKQLRASDFEGAMGQDNNPEWKTVAWDELSDRLVVPNGSIGFRWGE…
	narH	Respiratory nitrate reductase beta chain	MKIRSQVGMVLNLDKCIGCHTCSVTCKNVWTSREGMEYAWFNNVETKPGIGYPKEWENQDKWKGGWMRRRDGKIEPRIGGKWRVLANIFANPDLPEIDDYYEPFDFDYQHLHTAKQGDHQPVARPRSLVSGERMKKIEWGPNWEEILGTEFAKRRRDKNFEQVQADIYGQFENTFMMYLPRLCEHCLNPACVASCPSGAIYKREEDGIVLIDQDKCRGWRMCISGCPYKKIYYNWKTGKSEKCIFCYPRIEAGMPTVCSETCVGRIRYLGVLLYDADRIEEVASSPDVRDLYRRQCEIFLDPHDPEVIEQARKDGIPDNVIKAAQESPVYKMAMDWGLALPLHPEYRTLPMVWYVPPLSPIQSAFEAGDLERDKYDGVLPKIESLRIPVRYLANMLTAG…
	narI	Respiratory nitrate reductase gamma chain	MSSFMNYLDSLLFGLYPYLAGSVFLIGSLMRYDHGQYTWKTGSSQMLSSKNMRLASNLFHIGIITIFFGHLVGLLTPHWLYGPFISAGTKQVLAVVVGGIAGVMCLVGGAMLFYRRLTNPRVRASSSTMDTVIIGLLVLQVALGLLTILPTLGHLDGSKMLQFSGWAQSIVYFQGGAAAHLEGVSWIYKLHILVGLTIVLVFPFTRLVHVWSAPMGYVTRRYQIVRRRA
	narJ	Nitrate reductase molybdenum cofactor assembly chaperone NarJ	MADAALQMPQEAMIQPEFGMRSLRVLARLLDYPTEALQGAVGELIEALDAERRLPAVLRGDLMSWCQRIFDADLLELQSEYVALFDKGRAHSLLLFEHVHGESRDRGQAMVDLIDEYKAAGFELDARELPDYLPLFLEYLSTRSDEEIGRWLGEIRHILALLTARLEERGADQALVTRALLALIDAEDDIEASRQAVASEKRDDTPEALDAVWEEEAVRFSAKSDEDCALQSAEGRRLAERKRQVQGEAIRILDPVDAAKKH
nir operon	nirK	Copper-containing nitrite reductase	MKFTRSVLARSVALLATSAALANPAFAAHGEVLSPADVTPDVTYTLRTAVADGKLVFVGDKGDIKDVINPDLHAPVGAVVQINLINGDGAMHDIALPEFGVDSDDISGQGAATAVAFRVDEEGNFEYLCSIPGHKAAGMVGNLIVGDPVPGEAREAAPDLSMDPHAVGEPVGDRGPQEVTLNLETTEREGHLADGSSYRYWTFNDTVPGPFVRVRVGDTVHVNMSNAEDSAHIHSVDFHAVTGPGGGAAVTQAAPGQTKSFSFQALNPGLYVYHCATPMVAQHISNGMYGMILVEPEGGLSPVDREFYIMQGELYTAQRHGSQGLQEFSLDKLLDERPEHLMFNGNMDALTQTHKMEADVGDNVRIFFGVGGPNATSSFHVIGEIFDKVYDQASLTSPP…
	nirS-1	Cytochrome cd1 nitrite reductase	MHTRALSKGIFALSFPLAAMIGTAQAAAPELSAEEMERANTIYFQRCAGCHGTTRNGATGPNLLPKTTQELGQRRLESIITLGTEGGMNNFDGILSADDITLISQYIQHDPVEPPEMSLADMKERWQVFVAPEDLPTEPQHDLNWENFMVTILRDRGAMGIIDADTKELVTEVETGYAVHVAKESSDGRFWYVQGRDGRLSKIDLWMDPPQVTAEVFIGYDARDVAVSHYGEWKDKYVIGGSYWPPHFVIADAETMEPLKVVSTRSYDTQGNFRNEARVAALYNTPHAPTFLVNVKESGQVWQVDYSDIDNLRIDQMETAEYLHDGFFDPTGRYFQIAANMSDKMVFIDTETRKLISMLETGVKPHPGPGANWIDPECGPVAGTTHLGEGLLTFWGNDP…
	nirS-2	Cytochrome cd1 nitrite reductase	MMSENCYLKSLAVAVSIGALGIGAAKAQDGHEDIDEAKSAYQGTPSTVDPASARVVRTPGAPDLTEAEFEQAKQIYFQRCAGCHGVLRKGATGKPLTIDITQERGLEYLKVFINYGSPAGMPNWGTSGDLTEEEVELMAKYVMHEPPVPPEFGLAQMMDTWQVIVPPEDRPTEKMNQLDLDNLFSVTLRDAGQVALIDGGTKEIVKVLDTGYAVHISRMSASGRYIFVIGRDAKIDMIDLWMEEPDIVATLKIGMEARSVETSKYEGYEDVYAIAGAYWPPQYVIMDGQTLEPLKIVSTRGMTVGEQEYHPEPRVAAIVGSEQHPEFIVNIKETGKVQLVNYEDLNALSIVEIATSRFLHDGGWDASGRYFLTAANESNQIVVIDAKERELEQIVDVGQ…
	nirC	Cytochrome c55X precursor NirC	MPMPAFNLLLMLAFCWFPVAVLADGTLSTERKEELETLLYQDCGSCHGMTLRGGLGPSLPRDRMATFSREALAHIILQGIPGSAMPGWKALISDADARWLAEHLQTDNPLETLAAPPRPGEQE
	nirD	Heme d1 biosynthesis protein NirD	MPCQIPDFDELDRRLIDAYQRDLPLCERPFAAMAERLGASEAQVVERLQSLQQRAVLSRVGPVFDHARAGASLLAAVAVPDAERDAVAAAINRSPGVNHNYAREHDYNLWFVMTAADVMQLEARLEALEEELGQPLLRLPMVEGYHIDLGFPIPWAELEAP
	nirE	Siroheme synthase	MTIHSHSRHLGFALDEAPLAPGEVAIVGAGPGDPGLLTLRALSLLQQADCLVFDRLVSQEVLAMARSQAKRYYVGKASSHHSLPQEETNALLVKLAREGRRVLRLKGGDPYIFGRGGEEAEHLIECGISFRVVPGITSASGCSSYAGFPLTHRDHAQSVTFVTGHAKADGELALNWSALAVPHHTAVFYMGLANAALISRELQRHGLPADHPVALVERGTTPEQRHVLTTLGDLEEAIEREALKPPTLIVVGEVVRLADTLAPGMTRLTRLAADSLDARRLAL
	nirF	Heme d1 biosynthesis protein NirF	MPLLPFKPLLVAAALALLSVQASAEPAPELRGTGDLGVVIERATGSVALVDTTRREVLRHVEGFGDLSHASVKFTRDARHAFVFGRDGGLTKLDLLTGEIDARIIQSGNSIGGAISQDGRFVAVGNYEPGGVKVFDTQTLELVADVPADYATPDGTTAQAKVVGLVDAPGNRFVFSLFEAGEIWTLDMSGDEPVLDKYRDVGKEPYDALITANGRYYIAGLFGEDGMALLDLWHPENGVQRILPDYGRGEERLPVYKMPHLEGWAMAGDLAFFPAVGRHEVLVADSDDWSLVGRIPVQGQPIFVMSRPDERQVWVTFAHPDNGRVQVIDTQSLEVVETLAPGESILHKEFTPRGEHIWISARDSDQVVVYDTHTFEELARLTAESPSGIFFTHRAHQIGL
	nirG	Heme d1 biosynthesis protein NirG	MNVARAHRPEPAELDAADRRIVNRLQEGLPLVPSPYAAVAAELSLSEGELLYRLERLLEAGVLSRFGPMYHAERLGGGLTLAALEVPEDDFERVAEKVNAFPEVAHNYRREHRLNMWFVLATETPQRIAEVIEAIEAATGLAVFNMPKQEEFHVRLHLPV
	nirH	Heme d1 biosynthesis protein NirH	MSVSTCPSEPAPAAGFVDGLDPLDRDIVLATQGGLPLVPDPWSAVGKPLGLAGNEVRARMQRMIDSGVIRRIAAVPNHYRLGYVANGMTVWDVDDAHVERLGREVAGIPGVSHCYRRPRHLPEWPYNLFAMLHGRSQGEVEQQAEALRERLGDACRDHRILYSSRILKKTGLRLARSSGRPR
	nirJ	Heme d1 biosynthesis protein NirJ	MFRVTRYVKSLLEPNPPGLETLGPARKPPGPVVIWNLIRRCNLTCKHCYTVSADIDFKGELSTEEVFRVLDDLKRFRVPALILSGGEPLMRPDIFEISRRAKQLGIYTGLSTNGTLIDESNIARIAECGYDYVGISIDGLEATHDEFRRRQGAFRESMHAVKLCKQHGIKVGLRFTLTQQNYEQLDDILALIAEHDVDKFYLSHLNYGGRGHRHRKQDAWYQMTRDAMTRLFDHCRAELESGIEREYVTGNNDADGPFLLMWAREHFPDRADALERRLINWGGNASGEHIANIDNLGTVHPDTFWWDHDLGNVRNRPFSEIWRDTQDELMQGFRQRPRPLKGRCAECRFLSICNGNTRVRAWKVTGDPWEEDPGCYLSNEEIGVEAGRERRVTAPSAIQ…
	nirL	Protein NirL	MSLTSPHRDTHGEVDPQRLRALLEGGLPLTERPWQALAEQCGMSEAEVLAWVERWQREGLIKRMGLVVRHHALGIRANAMVVWDLPDAAVAEVGRRLAAEPAVTLCYRRRRCSPEWPYNLFCMIHGTRRERVLAVLGDIIERQELQDIPHRVLFSLKAYKQCGGRYTREDQP
	nirN	Nitrite reductase associated c-type cytochorome NirN	MMRPTLLLCALLGFALPAWADAADPAMLYNQHCSACHGVGRLGGIGPALLPDNLSRLKPAEAVEVIREGRPATQMPAYGELLGLAEVEALAEWIYEPPEVAPNWTAEDILASHVVNHYYGTLPDEPVFEVEDLMNLFLVVEIGDHHVSLIDGDRFERIARFPSRYALHGGPKYSPDGRYVYFGSRDGWVTKYDIYNLEVTAEVRAGINMRNIAVSADGRYVLAGNYLPHSVVLLDARNLELIASIPVEGLDGDTSRVSAVYTAPPRNSFVVALKDIPEVWEIRWPEELAEGDEPLVGDFALHRMAAPDYLDDFFFDPEYRYLVGAARGGQGGQVFDLDSEAKVADLPLEGMPHLGAGITWELDGRRVMAMPHIDRGQVSVFDMTDWSPIAQIETDGPGF…
nor operon	qNor	Quinol dependent nitric oxide reductase	MGEYRRLWWTLIAVMAIAFGVLGYFGTEVYRQAPPIPAQVVTEQGEVLSGKERILDGQTAWQSVGGMQLGSIWGHGAYQAPDWTADWLHRELVNWLEIAAEEEFGQHWLDLDDEQRNLLEYRLKHEYRTNGYDADTDRLLISERRAQAIAATADYYDRLFGGSPELQPTRESYAMKEDTLPNAERRAQLTEFFFWTAWAAATERPDSHATYTNNWPHEPLIDNTPTAENIIWSIVSVVLLIGGVGLLVWAWAFLRKEEEETEAPLQDPLSRLPMTASQKALGKYLLLVVGLFTFQVFLGGATAHYTVEGQTFYGIELSRWFPYSLLRTWHIQSALFWIATGFLAAGLFLAPIINGGKDPKYQKLGVDILFWALVAVVVGSFAGNYLAINQIMPAHLNFW…
	norB	Nitric oxide reductase subunit B	MKYETQKVALPFFMLAMALFALQIVFGLVAAAAYVWPHFLSEAMPFNISRTSHTNLLIVWLLIGFMGSTYYLMPEEAENEIYSPKLAYFQLLLFAIAGAGALISYQFGIHEGRHYLEQPLWSKLLITISFLMFLFNTSMTMLKGRKTAINMVLMLGLWLAAVFWLFAFYNPDNLALDKLWWWWIVHIWVEGVWELIMASLLGYLLIKMTGVDREIIEKWLYVIVGLALFSGLLGTGHHYYWIGTPGYWQPIGSIFSTLEVIPFFAMVVFAFYMFWKGSRNHPNKAAMLWTLGCAAVAFFGAGVWGFMHTLSWINYYTHGTQVTAAHGHLAFYGAYVMLVLGIITYAMPQIRRVQPYNQVLNMWAFWIMTSAMWFMTFTLTFAGVVQTHLQRVLGMNFMQ…
	norC	Nitric oxide reductase subunit C	MTEGLTKAAARNIFYGGSLFFFLLFAALTAHSHFYIVNTSTQPMSDSVRLGKHVWEKHNCINCHTILGEGSYFAPEIGNVWTRFGGHNNPEGARMALKAWMNAQPTGAPGRRQMPAHDINDEEMQALIDFLEWTDSINTQDWPPHPAG
	norD	Nitric oxide reductase activation protein NorD	MQFLELEEFVGRHWHRWASSAASYQRYPEAAVSMEQMRHVLGVFFRASGGEAGVEVSAIVARSSNHRLSLRQKLGFDDEAIDQARRDEENLLLPPRIELFPDAGLNRDLYFWLVAYLAVARQTEPQRDPLRADLVRLREAVRTRDAALERFPGLAERYRRLCQALLLVRPARKRLPAMELALEQTLRTLLGEELELEGWAAAMHRAVLDPSLSLEGIHAPRGYRPPLPVPLWGQVVALGTGAGRDESREDPEEGETNSAQTVSDGKRKAERKRQDQTERDDPLIANRFEKMLSWTEMVNLNRLVEDNEDEEAKRAAEQMEEIILSPHKQRAATRIKVDLDLPPDEALGERLRGKHTYPEWNYRKQSYLPEHCLVHTELASEEGEQWQPDAATNRRIRRV…
	norE	Nitric oxide reductase activation protein NorE	MTERHELSQPRPLPNPGWGPLAALPGNPLMWVLILSEMVVFAAFFGLFAWLRAGEREVFDASQQLLDPVAGGINTLVLLTSGLFAALAVQSIVRGDRRRCRRWLGAAFALGVVFCVVKVVEYADKLGQGLMPETNTFFTFYYLLTGFHFAHVLFGLGLIALVAWRLSHANVETAAAFWHLVDLIWILLYPILYLLR
	norQ	Nitric oxide reductase activation protein NorQ	MSHTATATKAASAFTRDLPYYEPVGNECALFEQAYRQRLPLLLKGPTGCGKTRFVSHMAAKLGRPLFTVSCHDDLTAADLTGRYLLQGGETRWVDGPLTRAVREGGICYLDEVVEARKDVTVVLHPLTDDRRLLPLERTGELLEAPDDFMLVVSYNPGYQHILKSLKPSTRQRFVAMSFDFPPPRVECDIVARESGLSHERCAALVNLAGRLRELKGQDLEEGVSTRLLVYCATLIKAGMPILEATRATLVEPLTDDLDVQEGLLESIRATFG
	norR	Anaerobic nitric oxide reductase transcription regulator	MLDDSLLADLTADLPSVVRLQRLVRTLREGFRCGAVCLLRLQDDVLAPVAVEGLVREALGRRFEVARHPRLAAILTSRRSTLFPPDSSLPDPYDGLVEQQPGEPLHVHDCMGISLHVEGEPWGVLTLDALVAGTFDEAARTALERYALLVEAAVRVSRLEQEVRALRMANHGVIPHAEPGEGGEILGHSTGLQRLLNELDVVAESDLPVLLMGETGVGKELFARRLHQRSPRREQPLVQVNCAALPETLAESELFGHVKGAFSGATADRAGRFEAADGGTLFLDEVGELPLAIQAKLLRALQNGEVQRLGEDTPRRVDVRIIAATNRRLADGVREGHFRADLYHRLSVYPVAIPPLRERDSDVLVLAGHFLEINRARLGVRSLRLAPAAEAALLAYAWP…
nos operon	nosD	Copper-binding periplasmic protein	MKRLFSLLGGCGLLLLASLAFGGLRIAPGDGPLQTHIDAAASGSELTLAPGVYTGSIQIDKPLTLRGEPGAILDGEGSGDVIRVRAPDVRIEGLTLRNSGFNLTDMNAAIHAERGAHRLHVEDNAMHNVAFGVWLWHLEAPSVIGNRYAGSTAVRSQDRGDAIRLYNIDGGLIAGNDVRDARDAIYVDTSRDLEFRDNRLRDSRFGIHYMFTHGGRIVGNHTSGTRAGYALMMSRDLQVVNNRSERDMNYGILMNYVNYSTIADNDIRGITAWHGPAGGEHGVTLGAEGKALFIYNSQSNEIHGNRLADSELGIHLTAGSENNRIHGNAFIDNRQQVMYVATRTQEWSQDGQGNYWSDYLGWDLAGDGIGDTPYEPNDAVDRLLWRHPEARLLLHSPAV…
	nosF	Copper transport ATP-binding protein NosF	MNAVIECHWLTKRHGDLTRLDALDLTVKEGEVLALLGHNGAGKTTTMKLILGLISPSAGTLSVLGSAPDGPHAETLRRHLGYLPENVSFYEQLTGREVLAYFARLKRVDRRQVDKLLERVGLGDAARRRVKTYSKGMRQRLGLAQALLGEPRLLLLDEPTTGLDPAATRDFYETVRELRERGCTVLLSSHVLPGVEPYIDRALILGGGRRLALGSLDELRREASLPLTIRARGRWPGVDWSEGWEDTRISPRHLNGSALELGVHPSAKMSALRRLTGTPGVEDIDVLPPTLEHLYGHFSAPVTAASSTSKGDAP
	nosL	Nitrous oxide reductase maturation protein, outer-membrane lipoprotein NosL	MTRMTLTALLLAVLLAGCRSDADTALASAQPITDGDSCHVCGMLIAELPGPKGQAYLNRDETVRKFCSTADMFAFLLQPENEQRLSHAWVHDVAVTPWSRPADDAFVLASEAWYVAGHDRRGAMGHTLASFKERHHAEAFRDTHGGEVLAFGDIDLALLTELARTDASMQHGGGMPGHAGHDNSMPSHGEHGNVMPGH
	nosR	Regulatory protein NosR	MPIRRSPLSSLALIWLFGMLMLLGLPTQAFELSQVQVGFPSATRLADTDGGLPAKAVYADETLLGYAFETQDITPIPAYSGKPINMLVGVDREARITQATILGHEEPIMLVGIPEQRLVDYAAAHTPHHVNQRLRVGENLDAISGATVTVVVLTETVMRAARRVAAAQGLIDDPLATPPAQVRHDVFEPADWETLAGDGSVRRLHLTHGEVDAAFVGTAAETYASGEDPDSTFIDLYVTYLNAPTIGRNLLGDVVYEQLMERLEEGEHAIGVMARGDYSFKGSGYVRGGIFDRIEASQGNTNIAFHDRDHRRIVRLAIDGAPALTERDIFIVRGDAAFDPGEPWELGLLVRRAAGPLETEFVRFNAHYSIPEAYVERAEPAVEEALWVQVWRDKTFQIA…
	nosY	Membrane protein NosY	MNTALIVARKEFQDGLRNRWVLAIALILAALAVGIAWFGAAASGGMGFTSLATTVVSLSTLAVFLIPLIALLLAYDAVVGEQEAGTLLLLLTYPLSRTSLLLGKFLGHGLILGAATALGFGIAGTVIALAAEGVVLGELVASLGLLILSSVLLGWVFIAFAYLISVWVSEKARAAGLALGVWFLFVLVFDLGLLALLVSVQSGGDWLPWLLLLNPTDGFRLINMVGFDSSQAYTGVTAIAQGSAFHVGWLLLILVGWIVAPLGLAVLRFRRHSL
	nosZ	Nitrous-oxide reductase	MSDKKDHIKDLSRRHFLRNSAVTGVAGASLAGGFGAGALVRSGSAKAAAGNEHEVPPGELDEYYGFWSGGHSGEVRILGVPSMRELLRIPVFNVDSATGWGITNESKRVLGPNAPLNGDTHHPKVSYTDARYDGRYCFINDKANTRVARIRLDIMRADKIVTIPNVQAIHGLTLQRVPKTEDVFAVGEMIIPLNNDGQNMDDTSDYWTMMTCLDADTMEIKWQAIVDGNLDNCDTDYTGRFVAASCYNSARGMTLPEMMGPERDWTVFFDVPAIEKAVAEGNYTTLGDSQVPVVDAREQAHEGRNPFALYVPTPRSPHGVNTMPPEGKYCVVSGKLSPTCTVVEWSRVAEWFDGGLSDPRDTVVAEPEVGLGPLHTTYDNRGNAYTSLFLDSQVVKWNV…
Putative regulator of denitrification	narX	Nitrate/nitrite sensor protein NarX	MKLLQRSLVARIVASLLAISAMALISIVVTMAVAGGSRGDAAAINVAGSLRMNTYQIVAALQRYERTPSMEHQAAVHVLKRRFEERLASDELTSAIPVSEAHELRRQYRLVLASWHNELAPEVNEAVDSRTVNIESLNRTLDGLVNEIDLMVSQLEQNSEAKIRLLSALQILFLGLTAVVVAIALYDIRHNLVTPLRQLMVLAREAAQRNFSLRTQLKGSDELAMLGHTFDTMSEELGASYADLEARVKRKTQELERSSKVMQTLHDGSRSLYGGGNDLCASAAPMLRQVAELLDIGPIRLSLNDPHDNRQIPVLATHAARRPDFCRDHDCHACLISPRPLRLSDTEEGDCVLLPVSVGDEMLGTLEVWHPKEQRLSDSVRRLLNALADQLATAVYLQR…
	narL	Nitrate/nitrite response regulator protein NarL	MGQSVSETPASILIIDDHPLLRRGVAQLLELEDDLELVGDTGEPAQGVRLAAELDPDMILLDLNMPGMDGIQTLKALREAGYAGRIVMFTVSDHEDDLVAALRGGADGYLLKDMEPEEMVRQLRQAALGRMVVSESLTALLAEALRNQRSAPTTPDIHSLTQREREILRELAAGLSNKLIARKLDISEGTVKVHVKHLLKKLNLRSRVEAAVWAVQEGLE
	dnr1	Transcriptional regulator DNR	MKSPLSHEALQAVRQVPLFSGLETETLALLTEGALERCYRRGTLLFSKGEPADRFYVVVGGWIKLFRESPDGNECMVGLFTRGESFAEAAMFDRLGFPVNAAVAEDARLLLFPAEHFLTTLERNHGLALNMLANLSGMLRSLVRQLDQLTLQPTYQRLAAFIVSLCPDEEGPASVCLPCDKLLIAGRLGMKPESFSRAMARLKEVGVSCERNCVHVGDIAALRRFANTAEEALSAPLPGATINASRRNVLRPCR
	dnr2	Transcriptional regulator DNR	MNTPIYPPDSSSTDLLFKPKQLRELVQGVPWLGELEEDEVTALLEDTELKTLKTREWLFRQDAPAHWLYIVINGAVRLARSAGDGRLATIRSVERGGTLGELSMVSSAGVYLYSAEALRRTHVLAIPAQRCREIMDRQPACRAEFMSRLALELTERLEDLALLTQADAMSRLVSYILRQLPPGRSKSPRVVRLSIPKRWLAAQLAMTPETLSRLLAKLRDGGVIGIDRQRLTVLDEQKLRDAMLADD
	fnr1	Transcriptional activator protein FnrA	MGEGSNASQLIRLHEIRKACSSCSLRELCLPVALDRKDTDELDRIVERNRPLRKSEKLCRPGQPFSAIYAVLSGCLKSSLMGHDGESQVIAFHLPGELVGLDAIGSGSHPTTIEALETTSVCRIPFSQLEALSRKIPGLQHQLLRVMSKEIFCEHELLQVVSRRTAEQRLAIMLINLSQRFGRRGLSRTRFRLPMSRLDLGNYLGLAPETTSRTFRRFIDQGLLKVTGKEVELLDLSALQELTDGMSTPFHSRKQR
	fnr2	Transcriptional activator protein FnrA	MQQGATFSHLYAVRTGSLKQVTDGANSETLLTALYLPGDIIGFDSIGSGHYSGTIVALESSSVCRLPFECLDELSSRMPILRRHLQRNISRTMQEERLRLHQLLSRTAEARLAYFLLGISNRFRQRGYSPHHFRLAMSRGDIGSYLGLTHETVGRTLAAYQAQRLLYVSGRDYHLLDVTRLERLASSTGRRQKRA
	fnr3	Transcriptional activator protein FnrA	MMPQTVPRPTAGAARCKRCILHARCLPLGLERDALQSFDAILQLPRPLKRGETLVRQGDPFTSLYVVRSGSLKQSLVQGGRRGQVLNFYLAGEIVGLDGIGEQRYHSSVVALEATFVCKLPFTRLEDLAERVPGLRGQLYRCMSRELRNDQRMLCLLSGRTAEQRLASFLIGLSERFRSRGCSPYRFHLSMSRSDIASYLGLVLETVSRTLARFQEQGMLSVSGRELVIHDHEALSMLAREGVSGGCRLAPQSD
	crp-fnr1	CRP/FNR family regulatory proteins	MYLFHNFKERNDLCDEDKRLFATCTGPAREVRKGSHLAREGEPLECLHLIEKGWACRYKMLPDGSEPITSLLLPGDLSDSGMGLHTRMDFSIKALTPLRFTTINPESAERLFKRPRILRLFKASGHMSHNVALNWIINVSARSAEGRIANLLCECYARSHAAGLTYKGRYFFPLTQLEISDVLGLSSVHVSRSISKIKRKGLIENCDNRQIRIMNWSGLATLGGFRQENMEFLS
	crp-fnr2	CRP/FNR family regulatory proteins	MNPDESCIVRHFDRYFRLSDDDKALLVRLEDSASPVKAGTSLWEERDEAYEFCTLKRGWAFSYRDLENGSRQILEIYLPGDIVGLREFAFSQRLAGVQMIEDGEVCFFPHRHLIDIFRQSLTLTSIMFAISSRQQVMITERLVNLARRNARQKLAHFLLEMCQRVKQTQSDGCESFRLPLSQELLADLLGLSPVHISRTFTALNEDGLVFRDRHNVTIPDLEALKHEAGFDDRYLIENMRPLFHEANV
	NnrS	NnrS family protein	MNTASPAPHQPRLPLARLAFRPFFLLASLFSVLAMVVWFAFWHGDILLRPHGGLMWWHQHEMIFGFGVAVVVGFLLTAVQNWTGRPSLSGAPLLGLVALWLAARLLLAFPMGLPAWLLASVDLAFLPLAALVMARLVVAVKLWRNLMFVPVLLLLATANLAMHLGVAQGKLALIREGAYLAVLLIAVLMVLLGGRVIPFFTSRKLGRPQPAPIPLLEKLTLGSVLAVVLLQLVVLLGVAVPGVLRATVMLVAAAASLIRLGRWEGHLTLREPLLWGLHLSYAFVSVGLAMWAMALLGAFRVELAVHALAIGGIGAMMLAMMARVSLGHTGRAIRTLPGIGVGLALLFGGALLRSTVLAMFPQVTHWTYNLSILFWCIAYLIFLFHYSVPLLSARVDGKEG
	NsrR	Nitrite-sensitive transcriptional repressor NsrR	MHLTRYTDYALRVLIYLAVKGEERATIHEIAESFGVSRNHLMKVVQDLSHRGYITTIRGKNGGMLLNRSPQEITLGALVRDTEHELGLVECLRDSNECIITPACRLKPIFNEALGAFLAVLDQYTLADMLGRRQPQLARLMQIATSPA
assimilation of nitrate and nitrite	nasA	Assimilatory nitrate reductase large subunit	MREARTTCPYCGVGCGVLASVENERIVEVQGDPEHPANFGRLCVKGSALHETLGHHGRLTRPRVDGVETDWNTALEAVAERLAAVRAAHGPQALAAYLSGQLLTEDYYVANKLFKGFLGTPHLDTNSRLCMASAVAAHKRAFGADAVPCSYEDLEEAELVVLVGSNLAWNHPVLYQRLKVAKQRNPLLRVVVIDPRVTDTCEIADLYLGLKPGSDARLFTGLLAWMAKRNKLDRVYLEAHTQGFEEALAAAREQDAAVEAIAADCDVDAERLETFFYWFASHLHVVTLFSQGVNQSSSGTDKGNAIINCHLAGGKIGLPGAGPFSITGQPNAMGGREVGGLANQLAAHMDYDTPGARDRVTRFWATERLVPCLPEAPGHKAVALFEAIERGEVQALWIM…
	nirB1	Nitrite reductase [NAD(P)H] large subunit	MNTPVKPQLIVIGNGMVGHHLVEQLVEQGATERYAVTVFGEERHLAYDRVHLSEYFSGRDAASLALSTADYYAEHGIELRLHEAVTEIDRDKSEVVTPQGRYPYDRLVLATGSYPFVPPIPGNDREGCLVYRTLEDLDAIRAAAETATTGVVVGGGLLGLEAANALRGLNLDTAVVEFAPRLMPMQVDAEGGELLREKIEALGVQVLTGRATQEIVDGEASRHRMVFQDEKVLETDLIVFSAGIRPRDELARDSGLEIGERGGVVIDDNCLTSDPAILAIGEVALWNNSIFGLVAPGYQMAKVAAATLLEGNEAFKGADMSTKLKLMGVDVGSIGDAHGDRTPGARQFRFLDPLKQQYRKLVVSSDGKRLVGAMLVGDNSYYDTLLQYYANRIELPEDP…
	nirB2	Nitrite reductase [NAD(P)H] large subunit	MPRRHPETSTVEHLVIVGNGMAGHRLVEALLARTERPARITVIGAEQAPAYNRILLSPLLAGEMQREALTLRSAEWYAEQGIELILGERVEKIDCDARTLSTDADRRLDYDRLVLATGSNPARPPVPGLELPGVHVFRDLHDADALARAAESGRNAVVIGGGLLGLEAAEGLRKRGMQVSLLQRDDRLMNRQLDLTAARLLENELRGRGLDIHTDAQLERLEADAEGQVCAALLADGTRLAADCVVVAIGIVPNAELGRVAGLEVNRGVIVDEWLTTSDPAIHALGECCEHRGNLYGLVEPIWRQVEVLAERLCLDHDHADDEDAQGYVEKPTATKLKVSGISLYAFGPTEAEPDHEVLSYRDPQQGDYRRLLLRGGRLEGAVLYGDTASGPWYFEQAL…
	nirD	Nitrite reductase (NADH) small subunit	MSSAIAAKTMTQTWQILCTRADLVPYSGVAAWVETPEGPAQVALFYLPGHAQELYAIDHHDPFSNANVIARGIVGDLKGQPVVASPIYKQHFRLEDGQCLEDESITLRTWKVSFKGDEVWIEA
nitrate/nitrite transporter	NrtA	Nitrate-binding protein NrtA , periplasmic	MSNHYLSIENVDMTFTAKGVESQVLKGIDLAVERGEYISIIGHSGCGKSTLLNIVAGLIESTSGAVILDGKEVNSPGPERSVVFQNHSLLPWLTVYENVALAVNKTCARTKSKAERHEWIIKNLEMVGMGHALDKRPAEISGGMKQRVGIARALAMEPKVLLLDEPFGALDALTRAHLQEEVMRIQDELGNTMIMITHDVDEAVLLSDRIVMMTNGPSARIGEVLDIDLPRPRDRIALADDPRYNHYRQEVLRFLYEKQRKVESLAQRRGAGGEQEKAKEKRMAKA
	NrtB	Nitrate ABC transporter, permease protein	MKSMQSHEREPRVASTAWSGHVQRAGQLFSQRVLPPVVIIGLLLALWEILCSTPGASLPAPSQMLRDTWDLIANPFYDYGGNDVGMAWQILASLERVAYGYSLAVAAGIGLGVLVGQSTWAMRGLDPVFQVLRTVPPLAWLPISLAGFQDSNPSAIFVIFITAIWPIIINTSVGIRNIPEDYRNVARVLRLNGMEYFTRIMLPAAAPYIFSGLRIGVGLSWLAIVAAEMLIGGVGIGFFIWDAWNASMISDIVLALIYVGIVGFALDRLVAFIGNRVTRGTAQG
	NrtC	Nitrate ABC transporter ATP-binding protein	MNKTNKGHSLDRRRFLKQSATVLGGSAVLGSLPASWALASGRPETTSAKLGFIALTDAAPLFVALEKGFFAAHGMTDVEVLKQSSWGTTRDNLVLGSQRNGIDGGHILTPMPYLIASGAMTPNNVPVPMHILARLNLGGQCISVAQEYLDLEVGVDAGEFRQALADKRAAGNEVRAAMTFPGGTHDLWIRYWMAAAGIDPNGDISTIVVPPAQMVANMRVGSMDTFCVCEPWNEQLIHQGIGYTALTTSELWHNHPEKAFAMRADYVEANPNATRALLMAIMEAQMFCEEPQNKEEVARICSRRRWINAPYEDIVERMKGNFDYGTGRIVEDSPHQMRYWSDFASYPFQSHDLWFLTENQRWGYLPADFDSQTLIRQVNREELWREAAAALGVDGADIP…
	narK1	Nitrate/nitrite transporter	MEILNKANRIRLLSLRTPQMRAFHFSWFAFHICFFGWFGIAPLMAVVREDLALTQTQIGNTIIASVAITVIVRLLIGVLCDRLGPRKTYTGLLLLGSIPVMSIGFANSFETFLLARLAIGAIGASFVITQYHTTMMFAPNVVGTANATSAGWGNLGGGTTQIVMPLIFSGLLMLGVSETLGWRLAMVVPGVVMFVTGIGYWLFTQDAPNGNFSELRAKGELPEASGDNGAAKSFLAAAKDIRVWALFVVYAICFGVELTINNIAAIYFFDNFDLTLATAGMIAGLFGLMNVFARTLGGVFSDLFARNGGLKGRVRWLFIALICEGIALVAFSQMHVLSYAIGIMLVFSLFVQMAEGATYGVVPFINKKALGAVAGIVGAGGNVGAVAAAFLFRSEAITY…
	narK2	Nitrate/nitrite transporter	MKVSAVFKFRSPEIRALHLTWIAFFITFYVWFNMAPLASSMLKSVDWLTRDDIRLFAIVNVALTIPARIIVGMALDRFGPRRVFSVLMVAMAVPALVFAFGNTMSQLLISRLVLSSIGASFVVGIHMTALWFKPKDIGFAEGFYAGWGNFGSAAAAMTLPTIALTMFGGADGWRYAIGMSAIVMAAYGVFYWFAITDGPDARAHRKPRKALAMEVSSWGDMIKLILWTIPLVGCLAILVWRIEGMGYLSSTGALICYVVIAAVVIYQIVQILRVNVPILKKGVPEDDKYSFSSVAALNSTYFANFGAELAVVSMLPMFFEETWGLTAAAAGLIAASFAFVNLVARPMGGLVSDRMGNRRFVMLSYMFGIGIGFVLMGMLNSNWPLIIAIAITIFTSFFV…
	narK3	Nitrate/nitrite transporter	MTHVGKLQAPGQHVDYRSLVVVLLSPLAFALVFASWTIFAVLGVELKRVLLFGEVQFAMLLAMPMFTGALASLPMALLARRVGGRRVMIGCLLLICPLLWGIAHSDVYLEFLLAGAGLGLGAGSLAAGLVYVASLCPRRHAGLALGLYGAGMLGAGLTYFLLPLISQAYGWPMAPKLYLMPMLLVALLLWVFAEDAPSAALPAVPDYLVGFEPRPERALALRRWLPSPAVCRLALYYSFFYGAFVALALWLPGYLAAQYQLSLKLAALWALAFTLPGGVGQIVGGALADRRDFRDLRWWVSACVMVCLFLLSYPDFSMQIHGVHGDIALAFSMPLGGFTALLAVMGLAMGVGKGSLMRLLHRDHGDDMAHAGGLALTLGGLFAAVLPLMFVLGNEWIGI…
	narK4	Nitrate/nitrite transporter	MSYLLPAEFATKMVDAGEAKLHMSTRDALIRAFMAGAILAIAAVFAVTVAVQTGYPIIGAILFPVGFSILYLMGFDLLTGVFVLTPLAWLDKRPGVTINRILKHWGIVFIGNFGGALTVAFLMAIVFTYGFSTEPSEVGRVIGEVGEGRTVGYKEYGAGGMATIFIRGILCNWMVSLGVVGAMISTTVSGKVIAMWMPIMLFFGMGFEHSVVNMFLFPSGLMMGGNFSIMDYLIWNEIPVVLGNLIGGLALTGLTLYTTHVRTAPQKAL
	nark5	Nitrate/nitrite transporter	MSAPVPRTQQQRALGISTLSFTLCFAVWTLFSILGIEIKDDFALSDTQLGLLMATPVLTGSISRLFLGVLTDRFGGRWVFSLLMLCTAACVYLLTFANSYPMLLVGALGVGLAGGSFIVGVAYTSAWFDKEHQGTALGIFGAGNVGAAVTNFGAPFLLMAMGWQGTALAYATILAITGVLFLILAKDDPLADQRNATSVSFAEQMAPLADIRVWRFSLYYFFVFGAFVALALWLPHFLIEVYGLSLAEAGFVAALYTIPASLFRILGGWMSDRYGARRVMYWTFIVSALCCFLLSYPPTDYIVQGVHGPVSFSFTIPLAGFIVLTMVLGFFMSLGKAAVFKHIPVYYPKNVGIVGGMVGMVGGLGGFFLPLTFGMLNDVIGIWQSCFMLLFVIVAAALI…
	narK6	Nitrate/nitrite transporter	MQHLEGVTRPQQYRALGLSTLAFTTCFAVWTIFSIIGIQIKQDLGLNETQFGILVATPILTGSISRIFLGIWTEQFGGHRVFSVLMLLTAACVFLLSYVESYAMFLVAALGIGLAGGAFIVGIAYTSYWFEKDKQGTALGIFGAGNAGAAVTNFGAPFLLLALGWERTAVVYAVVLAAVAVGFWVFATEDPLTRARRRGQGAQATSARAQLEPLRHLRVWRFALYYFFVFGAFVALASYLPRYYVGAYGVSIAVAGSLAALYTLPASVFRALGGWMADRYGARAVMYLTFIASLVCLFLLAYPETRYVVQGKEGEIAFTLAMPLWGVVVLTVLLGFFMSLGKAAVFKHIPVYYPENVGSVGGLVGMIGGLGGFFLPILFGIVLDLTGIWTSSYMVIFML…
	narU	Nitrite extrusion protein	MAKSSADIGKLGAGRPKNADIEHWDIENEQFWEQEGKKVASRNLWISIPSLLMGFAVWMMWGMITTQMQNLGFPFAVDQLFMLTAIAGLAGATLRIPASFMIRIAGGRNTVFLTTALLMIPAFGTGVALMNPDTPFWVFQTLALLSGIGGGNFAASMSNISTFFPKKQQGYALGMNAGLGNFGVTTMQILIPLVMTVGIFGAIAGGSMELTSASGTLIGRIEAGTPTWIQNAGFIWLVFLVPLAFLGWFGMNNLRPITPNPGTPLQAFGKILGLYGVGVIATVVGIVTLQWLGMWVALPVTILLTLALMRLIPGEIKPNIQKQFAIFSNKHTWSMTVLYILTFGSFIGFSAALPLSINVIFGNMMEVAADGSVARVVNPNGPSALTWAWIGPFVGALIR…
regulater	nasR	Nitrate regulatory protein	MTPAERLLLTAKRCEIDDLEHLTAACDIVGDVSRFVHALQKERGASNVYLASQGQRFAERRRERIAESQATEQALRVRLDALGDSAGRPATTARLLRRIAHVWHALDGQAGLRDAIGALETSPDGATQAYNQLISALLSVVFEVADTAGDPEITLALVAIFHLMQGKELAGQERACGASGFTSGNFDDAHRQLLLHLIDAQQRCFDTCLEFTTAAGRECWQLEMPGRTLAGIQQLRELACGDTPLQQSASTLGETWYELTTRRIDAIQRVEAFLIGELSNLCLTKTLDARRSLTRHDELSRELNNATPAVCQQLVELFDGSGSHELGEVTARVVGSSLNRSLVELMCAQASRLQALSDELESTRRALRERKLIERAKGLIMAHQQMSEEQAYAFLRKMA…
	nasS	Nitrate-binding protein NasS	MSHPQHHAASPELERLTLGFVPLLDAALLIVAREQGCFAAQGLEVSLSRENAWSTLRDKVAAGLLDGAQMLAPMPLAMSLGLGRAPCETLAPTLLSRNGNTITLSTSLCQASGAALATDPGTSALALGDWLRGPGSGKRPRLAMVYPYSCQHYQLREWLTLGDIAPDRDVELVALPPPRMVEALRNGQIDGFCAGEPWGTLARHCGAGQLVATGAQLWQDHPEKVLGVTRSWAQRYPATLAALLRALATASEWLAASPDHRRQAREWLALPPYLDRSIRHLETLDNDAAPIHQHLCGADMLRPTPQAALHFAAPIVSQLEAQGGRFDPALLAACYSPVHFDAATHH
	nasT	Response regulator NasT	MPSPSPLNILLVDDEVVRAAMVEEALMAEGHRVICRLTSPASLNEMVERHQPDVVIIDMESPDRDTLESMALLNRENPRPVVFFADQHDSDTLQAALKAGVSAYVVDGLVPERVEAIVEVAIARFDAFHSMRQELDKARNQLAERKRIERAKGLLMKHQSCDEEQAYRMLRKLAMDRGQRIAEVADSVIDILDRLNPTLASPQGRPDQRGSRS
ammonium assimilation, transporter and regulator	glnK1	Nitrogen regulatory protein P-II	MKLITAIIKPFKLDDVREALADNGVQGITVTEVKGFGRQKGHTELYRGAEYVVDFLPKVKVEVAVDDSRVESVLDAICSAANSGKIGDGKVFVTPLEDVIRIRTGERGAEAV
	glnK2	Nitrogen regulatory protein P-II	MKLVTAIIKPFKLDDVRESLSEIGVQGITVTEVKGFGRQKGHTELYRGAEYVVDFLPKVKVEIAIDDDLVEQVIDAITQVANTGKIGDGKIFITPLEQVIRIRTGETGKDAV
	ntrB	Nitrogen regulation protein NR(II)	MYRRLMEHLTTAVLLLDDELRLSWMNPAAEALLAVSLGRVQGLSLAALLTEDDGMGDVLAKARDDQHPFTQREVRLALLGGTAVTVDYTVTPLSMSELLVEMEPRDRLLRISREEALLNRQEAIKVLSRGLAHEVKNPLGGIRGAAQLLERDLDDPTLKEFTRIIVEEVDRLRDLVDSMLGPNKLLRHEPLNVHKVLERVRALLMAETPSVTIERDYDPSLPDFPGDEAQMIQAVLNVARNAVEAMTEAGTEAPSLLLRTRARRQFTLGAERHRLVCEVALIDNGPGIPESLQETLFYPMVSGRADGSGLGLSIAQGILHQHQGLIECESRPGHTEFRLLIPLERRHD
	ntrC	Nitrogen regulation protein NR(I)	MTDVARVAVVDDDRAIRWVLERALAQPDLEVECIDRADVALSRLLDDPPDVLVTDIRMPGIDGLDLMSRIREVHPELPVIVMTAHSDLDSAVASYQGGAFEYLPKPFDVDEALALVRRAVAHARERKRPVSVPEGLSAEIIGEAPAMQEVFRAIGRLSHSHITVLINGESGTGKERVARALHQHSPRSGQPFIALNMAAIPRDLIESELFGHEKGAFTGATASRQGRFEQANGGTLFLDEIGDMPAETQTRLLRVLADGEFYRVGGHTPVKVDVRIIAATHQNLERLVEDGRFREDLFHRLNVIRVHLPKLAERREDIPRLARHFLAEAAKELATDVKVLTKDAEAHLTRLPWPGNVRQLENTCRWLTVMASGREILVEDLPPELRHGESGEAPSGDWR…
	gltB	Glutamate synthase [NADPH] large chain	MNRGLHQPGEFRDNCGFGLIAHMEGQASHDLLRTAIESLTCMTHRGGIAADGKTGDGCGLLLKMPEAFMREVAVEALDVELGERFAVGAVFLPDDDAKEARARGILEGELRACGLVIRGWREVPVDPSCCGPIARACLPRIRHLFVEPGKLGDADRFDVDLFMARRRAEQMLRDEEDFYVCSLSSRVISYKGLMMPVDLPTFYQDLGDERLETAICVFHQRFSTNTEPRWPLAQPFRLLAHNGEINTIEANRSWANSRKENFVNERLPDIAELDEIVNTVGSDSSSMDNMLEVLLMGGMELHRAVRMMVPPAWQNVETMSSELRAFYEYNSMHLEPWDGPAGVVMTDGRQAVCMLDRNGLRPARWVITKNGYITLASEIGTYDYKPDDVVAKGRVGPGQ…
	gltD	Glutamate synthase [NADPH] small chain	MANRLTRNDFQFIDVGRQDPQKKDARTRSREFAEIYEPFKPQEAASQSHRCLHCGNPYCEWKCPVHNYIPNWLQLVAEGNILEAAELSHKTNSLPEVCGRVCPQDRLCEGACTLNDGFGAVTIGSVEKYITDTAFAMGWRPDMSQVTWTDKKVAIIGAGPAGLGCADILVRNGVKPVVFDKYPEIGGLLTFGIPEFKLDKTVMERRRAVFEEMGIEFRLGVEIGKDIPFESLLEEYDAVFLGMGTYKYMTGGFPGEDLPGVHKALDYLIANVNHCLGFETDPADYVSLEGQKVVVLGGGDTAMDCNRTAIRQGASSVTCAYRRDEENMPGSKREVANAREEGVEFLFNRQPVAVVGEGKVEGVKVVRTRLGEPDENGRRRPEVVPGSEEILPADAVVIA…
	amtB	Ammonium transporter	MSDLAELSYALDTFYFLICGVLVMWMAAGFSMLEAGLVRAKNTAEILTKNIALFAIACTMYLLVGYAIMYSSDAGGILPNLGVLIGAENSVDAVTAGGDDAPYYSMRADFFFQVVFVATAMSIVSGAVAERMKLWAFLAFAVVMTGFIYPVSGYWTWGEGWLDELGFSDFAGSGIVHLAGAAAALAGVLVLGPRKGKYGKDGSIHAIPGANLPLATVGTFILWMGWFGFNGGSELKLSDVASANNVAQVLVNTNAAAAGGVIAALILAKLWFRKADLTMALNGALAGLVAITAEPLAPSALGATLIGAVGGIIVVASIVTLDKLKIDDPVGAISVHGVVGIWGLLAVPLSTDTGFGVQIIGALAIFAWVFVASLAVWLILKAIMGVRVSEEEEYEGVDL…
	gdhA1	NAD-specific glutamate dehydrogenase	MQYETIEVGRQEILKQLRERLESRLDKTRAEEVEAFSRHFYATAPLEDLADRRVDDLYGATLSVWHFIQHFDHASPKVRVFNPDFEEHGWQSSHSFVAVLHEDMPFLVDSVRIELNRRGLTVHAIHNAVLAVERNRNHGLLRVASPRDADAPDNRESMIAIEIDRHSNPEVLAEIEQSLHEVLRDVRTAVGDYEAMCDRARQAVAELQASRPEQIEPGDHEEAVAFIEWLIRDNFTFLGYDAYDIESDAEGDRLVRDEQSKLGVFRLDLSRYQERIRTELGIDGNRFVLVPQLLSFAKSAHHARVHRPTYPDYISIDRYDEQGRLVGEHRFLGLFTSSVYNESPRNIPLLRHKLKAVMEIAGFNPKGHNGKQLLQILEVYPRDDLFQIDTQELARTALG…
	gdhA2	NADP-specific glutamate dehydrogenase	MTYIHDTLEGLRRSSPAQGEFYQAAEEVLECLRPLLETVPRYHQHSIIERIVEPERQIMFRVSWVDDAGKVQVNKGYRIQFNSALGPYKGGLRFHPSVNASIIKFLGFEQIFKNALTGLPIGGGKGGSNFDPKGKSDGEIMRFCQSFMNELYRHIGPTIDVPAGDIGVGAREIGYLYGQYKRLTGRYEGVFTGKGLNWGGSLGRKEATGYGAVYFAQNMLEARGDSITGKTCLVSGAGNVAIYTIEKLYQLGARPITCSDSRGTIHHPEGIDLDTLKLLKEIKRTSLREYVEHHPEATYIDAQDYPSDGHAVWRIAGDVAFPSATQNEVTEADAIALLNNGVHCISEGSNMSSTAAAVDRFLETRVAYGPGKAANAGGVATSQLEMAQNSSMQQWTLEK…
	gdhA3	NADP-specific glutamate dehydrogenase	MSGQMDHANLFDDARSRLEEVFDAIGVQGDARERLRQPSLSLQVSVPVRMDDGSLRVFPGWRVQYNNILGPAKGGIRFHPEVSQEEVTTLSFWMAVKCAVVDLPYGGGKGGVKVDPKQLSKLELERLARGYVRAIADIMGPDRDIPAPDVNTNATVMGWMADEFDHLARGKVPAAITGKPPALGGSLGRVAATGRGALHVLDLWAARERRKPEETTVAIQGFGNAAYHFARLAHERGYRIVAVSDSKGAIYSREGLDPDPIMEQKTHNQRLHDMVYCDDSVCIADDVEKLERDELLTLEVDVLALAALENQIHEDNVDQVKARAVLEIANGPVTSQADERLEKRGVPVLPDVLANTGGVIVSYYEWVQNRNGERWAEENVNARLAERLERQSQLIFERA…
	glnA1	Glutamine synthetase	MSAKTLALIEEHDVKWVDLRFTDTRGKEQHVTIPARDVNEEFFENGQMFDGSSISGWKGINESDMILRPEDGTAFLDPFTEDATLVLRCDIIEPATMQGYERDPRSIAKRAEAYLQSTGLGDTAFFGPEPEFFIFDEVHWKADIEGAMYKITSEEGAWSTDRQVEGGNLGHRPRVKGGYFPVPPVDSFHDIRGAMCNTLEAIGQSVEVHHHEVSNAGQNEIGVKFNTLVKKADEVQELKYVIHNVAHAYGKTATFMPKPLVGDNGSGMHVHQSFWKDGQNQFAGDQYAGLSEMALYYIGGIIKHARALNAFTNASTNSYKRLVPGFEAPVMLAYSARNRSASIRIPYTASPKGKRIEARFPDPTANPYLAFAAMLMAGIDGIKNKIHPGDAMDKNLYDL…
	glnA2	Glutamine synthetase	MPPLSADQAREFLARHPDIDSIDLLISDLNGVMRGKRIPRDNLDKVCRQGVNLPASVFALDINGHTIEATGLGLAIGDSDRVCRPVAGSLMPTPWLRNGRQGQLLMTMVEPDETPFFADPRQVLSRQLERLHKRGLTPVVAVEMEFYLLDRERTGDGLIQPPRSPRSGERASQSQLYSIGELDEYADFLEDVQRAAECQGLPLDTALKECAPGQFEITLGHCDDALRACDSAVLLKRLIKGVALNHGFEATFMAKPYGLEAGNGTHVHLSMLDASGRNVFAAPDGDPLGSATLHQAVAGMLALMPASMAICAPNLNSFRRFQPGLYVPMTPTWGFDNRSVALRIPSGSNDARRIEHRVAGADVNPYLLLAVLLASIEHGIAERLTPPAPVTGNAYEQFE…
	glnA3	Glutamine synthetase	MKDLESWLKERRITEVECLVSDITGIARGKITPVSKFMAEKGMRLPESVLLQTVTGDYVEDELYYSLLDPADIDMLCRPDISAVYPVPWAIEPTAQVIHDCYDKMGNPIELSCRNQLKRVLALYAEQGWKPVVAPEMEFYLTKRCEDPDLPLLPPIGRSGRQETGRQSFSIDAANEFDPLFEDMYDWCEIQGLDIDTLIHEEGTAQMEINFRHGDPLMLADQVFLFKRTLREAALKHDVVATFMAKPITNEPGSAMHIHQSVLDVATGKSVFANEDGSMSQLFLHHIGGMQRFIPEALPLMAPNVNSFRRFLPDTSAPVNVEWGEENRTCGLRVPDSSPQNRRIENRLPGADANAYLAIAASLLCGYLGMVQKLNPSAPVQGRAFERRNLRLPFTLEQA…
	glnA4	Glutamine synthetase	MSRLQARDVRNADDARRIVEQRGLSHVKVGMFDIDGVMVGKYMRRDKFFHALSEGFAFCDVVLGWDSKDELYDNVTYTGWHTGYPDAALRVIPESCRELPCEGDMLLFLAEFTGPAGEICPRGLLRRVLAKAEAMGFTACGALEYEFFLFQETPESVREKGFRNLKPFTPDMMGYSMLRSSVHGELYHELLGMAEAMDFPIEGLHTETGPGVLEAAIRVDEALAAGDKGALFKTFTKVWAQRRGLMATFMAKWSPDYPGQSGHIHLSLNRTDSGESAFFDADQPHGMSDIQRHFVAGQQKLMPEFLAMFAPTVNSYTRLIPGFWAPTDATWGVENRTTALRVIPGSAKSQRVEYRLGSADANPYLALAAAIGSGLYGIEHQLEPDEMVTGNSYELAHPE…
sulfur oxidation	PDO	Persulfide dioxygenase	IIGNNLHVDAFYDEATSTISYLVMDRETRQCALIDSVLDYDPKSGRTCSASADRLVERVNELNASVRWVLETHVHADHLSAAAYLKEKLGGHTAIGAHITQVQKVFGALFNAEPGFARDGSQFDVLLEDEEGFRIGNLQARALHTPGHTPACMSFMIEDAGEIAVFVGDTLFMPDYGTARCDFPGADARTLYRSIRRLLAFPDQTRLFMCHDYLPGGRDMQYVTTVAEQRASNIHIHQGIDEDSFVAMREARDKTLEMPVLILPSVQVNMRSGQLPPPEANGVSYLKIPLNKL
	sqrII	Sulﬁde:quinone oxidoreductase	MPALLSPANTDHHKVVIVGAGAAGIATASSLISRDPSLDVALIDPAEVHYYQPGWTMVGAGVFKAPSTARTMASTIPRGVRWVKARVKGFDPLAQLVILDDGRAISYEQLIVCPGLKLDWAAIDGLSETLGRNGVTSNYRYDLAPYTWELVQKLKQGRALFSQPPMPIKCAGAPQKALYLSCDHWLRHGHLGAVKASFYNAGAVLFGVADYVPALMKYIEKYAVDLNFSHRLVAVDGPGKRATFLRTLPDGSSETRIEAFDMLHVVPPQVAPDFIRESPLADSSGWVDVDPHTLRHRKYTNVHALGDVANTSNAKTAAAARKQAPVVANNVLVALGRLATLAQYDGYGSCPLTVERGKIVLAEFTYGGKLAPSFPNWLLDGRKPTRLAWLLKAQALPPL…
	TsdA	Thiosulfate dehydrogenase	MNTQLLVTLLAMSIGGVALAAEIKMDDQSQLTQKAGKGAGESYFQPPQEKDLPANAYGELVQQGRAIFVDTQKYAAEYVGNGMNCTNCHLEQGRKANSAPLWGAYPMYPAYRKKNDKVNSYAERVQGCFQFSMNGTPPAADSHVINALTAYSYWLSTGAPTGQELPGRAYPEVPQPQGGFDIAKGKQIYAEQCAVCHGDDGQGQKAGGGYVFPPLWGKDSFNWGAGMHRINTAAAFIKESMPLGKGGSLSDADAWHVAAYMNSHERPQDPRLIEGSVEKTRLKYHANDGVNLYGQQVDGALLGQGVK
	fccA	Cytochrome subunit of sulfide dehydrogenase FCSD	MTQHSQRSGINRRQLIKGLGAASLLPLVGGVTPFAIGGQHAGKVVVVGGGFGGATAAKYLKRANPAIEVILVEPAETFYTCPFSNLHLGGLRSMDEIAHGYDELQDRYGVRVIHAMVEDVDAAAHKVTLSTGSELDYDRLVLSPGIDIRWNALEGYDEAAAEKAPHAWKAGSQTEKLRAQLEAMEDGGTFVMVAPENPFRCPPGPYERASLVANYLAQYKPKSKVLILDAKDNFSKQGLFMEGWEQLYGDRIEWVGLSNDGRVTRVDAERLEVETEFGTVHKADVLNVIPPQKAGWIAERAGVTDDSGWVPVKPETFESRQVEDIYVIGDATVAAPMPKSGFCANAQAKVVAAAIAASLESRPAPEAYWTNTCYSLVGPEYGISVAGVYRVVDGAIAEV…
	fccB	Flavocytochrome c flavoprotein subunit	MKRTLHEAIAMLLGVLPLLGSAIPSLAEDTFSTEQMALMAGACANCHGTDGRLAGSVPTIAGRPAAVLEARLLAFKRDEASDATVMNRIAKGFSDEELAALAGHFSAIDPQADEAWETEQGAQE
PHA synthesis	phaA	Acetyl-CoA C-acyltransferase	MTTASRTTPSPAASADDIVILAGARTPMGGLKGSLSTLSAPQLAAVAIKAAIERAGLTPADVDEGIFGCVLPAGVKQGPARQAMRQAGVPDSIGATTINKLCGSGMKATMLAHDLIRAGTNRIMLAGGMESMSNAPHLLTQARGGYRLGHGELKDHMFFDGLEDAETGKLMGVFAQEVADARGYDRQRMDDFAIESLRRAMTATESGDIAPEIAAVTVKSRKGESVVEQDEQPFQANLDKIPTLRPAFAKDGTITAANASSISDGASALVLTRRDEAERRGLAVKARILGHSTHSQHPSEFTLAPIGAIDSLMKRLEWTTEDVDLFEINEAFAVVTLLAMDAHDIPHDKVNVFGGACAQGHPVGSTGSRIIVTLINALERRGKKRGIAALCIGGGEATA…
	phaB	Beta-ketoacyl-ACP reductase	MTQTAPVAWVTGGTGGIGSAICRELANQGYQVIAGYRNKEKAEGWLSEQRAAGFENIALSGIELDNFEACQAGVNEIRERFGPIAVLVNCAGITRDTSMRKMSYEQWREVINCNLDSVFNTCRAVINDMLEHKYGRIVNISSINGRKGQFGQVNYSAAKAGMHGLTMALAQETATKGITVNTLSPGYIATDMIMKIPEEIRESIRETIPVKRYGQPDEIARAVAFLADEKSGFITGANLDINGGQFMG-------------------------------------------------------------------------------------------------------------------------------------------------------…
	phaC	Poly-beta-hydroxybutyrate polymerase	MQSPAQPGASSYHLSQREGGAEATCTTQTSTVSHAIEGDDETTLAPSLYDTIDRIVHAGVARSTLGLSPSVLAEAWMDWAVHMAISPGKQMQLLESALWGSWAVYQEALGIKEQAIDQPDGKDQGGKSQESEAQESEAKGRAQAGPHIADRRFRDAAWQQLPFSLWASAHAQNWQWWQQAVTGVHGMSPAHENLLAFVSGLMVDTLSPSNYAQTNPEVMTTTLSEGGKNLVRGAQHLMEDLERRGRAASATPASTSALHDAASSAQQPPVEVGQTLAITPGKVVMRNRLIELIQYSPATETVQAEPLLIVPAWIMKYYILDLSPHNSLVRFLVNQGYSVFMVSWTNPDATLRDMGLEDYRHLGVLEAIDAIQAITAAKHLHAVGYCLGGTLLSIAAAAM…
	phaR	Polyhydroxyalkanoate synthesis repressor	MRVIRKYANRRLYDTQQSRYVTLEDLRRLVLDEEPFRVEDAKSGEDLTRTILLSIIIEQEQADGEAEVFSNDLLAQFIRVYDMAQPLPLARYLEQGTQLMLEQQKRMQDQWQQAMRHSPMELMREMAEENMKFWQKAIGQAQPGKPQGKPDKNDDKSS-------------------------------------------------------------------------------------------------------------------------------------------------------------------------------------------------------------------------------------------------…
phosphonate transport and metabolism	phnC	Phosphonates import ATP-binding protein PhnC	MSITRIAVERLSKSFGQIHVLSEVGFEIEAGEMVALIGPSGSGKSTLLRHLVGLTSANRHSGSRVHLMDREVQRDGRLLRGSRAQRCRCGYIFQQFNLVGRLSVLTNVLIGRLGSMPRWRALLGRFSEEERIRARQALARVGLAELAEQRANTLSGGQMQRVAIARVLMQDAEVIFADEPIASLDPRSAREVMDILQRINLEDGRTVLVSLHQVDYARRYCSRAIALKRGHLYYDGPTEGLTEARLQALYENAGFDEPRQPPAPIAANVALGAAS----------------------------------------------------------------------------------------------------------------------------…
	phnD	Phosphonates-binding periplasmic protein	MSTKHRRLALPLIAGLGLLGSQLAVAEEQIDTLRFGIISTEASQNQEPLWRPFLDDMAETLGVEVEPFFANDYAAVIQAMRFDKIDLAWYGNKSAMEAVDRAGGEIFAQTVPENGEPGYWSLLIVHQDSPYENVEDILANASQLTFGNGDPNSTSGFLVPGYYVFAQNGVEATDIFKRTLNSNHETNALSVANRQVDVATFNTESMDRLELAHPDKAAQLKVIWQSPLIPSDPLVWRENLPESMKTRLRDFILSYGETEEQREKIEPLQWARFDASDNDQLLPIRQLELFKQRAQLAADDSLNEADKQHQLAELDARLDDLDERLKAREAARAEQGEAGLTTAMAQ-----------------------------------------------------…
	phnE	Phosphonates transport system permease protein PhnE	MTVTNPTLADASAKRSWISLLGWAIALGVLAWAWQGTEMNPGALVSNAGNMAELAADFYPPAFGNLGRYIDQMLVTIQIAIWGTLLAIVLAIPCSLLSSENLVPWWVYQPMRRLMDACRAINELVFAMLFVVAVGLGPFAGTLALFVHTTGVLAKLFSEAVEASEAGPMEGIRVTGAGRIEEIVFGLIPQVLPLWISVSLYRFESNIRSATVLGMVGGGGIGVALWETMRGFQYAETATIMLVIIVAVTVLDMASQAVRKRFI----------------------------------------------------------------------------------------------------------------------------------------…
	phnF	Probable transcriptional regulator PhnF	MSRQLAKEPLDEAPRYRKLADTLAREIRSDYAPGELLPAEVALARRFGVNRHTVRRALDELVAAGMVTRHQGRGTQIVDRRLDYAVNAASKVTHNLAALGIATQTECLAQGLQVPPEAIAQRFGYGPGEALLCVDTLRSVDGAPLMLLRHWFDPERVPGWERRYRGGSTRALLDQHYGLQLFRRRVRIEGISATRDDSRRLQCPLNAPLLQLASDNVDHDGTLVEVSISRARADRLAYHIDFAPTDEVPS-----------------------------------------------------------------------------------------------------------------------------------------------------…
	phnG	Alpha-D-ribose 1-methylphosphonate 5-triphosphate synthase subunit PhnG	MTSLQDRRMSQARRQRVLALSPRQQIETRWTTLGIRIAHRCVRGPETGMAMLRGRMGGTGRAFNLGEMTLTRASVVLDEASPVAGALGHGWVRGRDRRHAELIALIDACAQHEAWARHIDSELIAPLEDALEARRGEAARDTAATRVDFFTLVRGE---------------------------------------------------------------------------------------------------------------------------------------------------------------------------------------------------------------------------------------------------…
	phnH	Alpha-D-ribose 1-methylphosphonate 5-triphosphate synthase subunit PhnH	MPWPTLNDPVHDSQRLFRQVLAAMSEPGTLHTLAAPAPPQATIGSALWGTLLTLCDLDVRVWLAPALDTPALREALPFHTGCRLTDEPVSADFALVTPAALCEAPDFALGSDEYPDRSTTLLVALELLDSGDTGSGTWQLSGPGIPAQRTLRVEERARPLMLRLAANRQSFPCGLDAILTCGERLAALPRTTRIEEIA---------------------------------------------------------------------------------------------------------------------------------------------------------------------------------------------------------…
	phnI	Alpha-D-ribose 1-methylphosphonate 5-triphosphate synthase subunit PhnI	MYVAVKGGERAIANAHRLLADRRRGKRERAELEVGQIQDQLRLAVDRVMAEASLYDPELAALAIKQASGDMIEAVFLLRAYRTTLPRLAVSEPLDTGSMRIERRISATYKDIPGGQVLGPTYDYTHRLLDFLLLAEGDTPAPERSEQPLEPCPQILELLDAEGLIERERDDGAEPGDITREPPDYPVDRATRLQMLARGDEGYLLALGYSTQRGYGRNHPFAGEIRLGQVEVEIFVEEWGEAVCVGEIALSECQMINQFGGSREAAPQFTRGYGLAFGHSERKTLAMALVDRALRAEELGEEVQGPAQQAEFVLAHADSVEASGFVSHLKLPHYVDFQSELELLRRLRREYEAKSPDRAEATEDGPSQGEPQASTADAATLGSTV--------------…
	phnJ	Alpha-D-ribose 1-methylphosphonate 5-phosphate C-P lyase	MNGYNFAYLDEQTKRMIRRALLKAVAIPGYQVPFGGREMPMPYGWGTGGMQLTASILGADDVLKVIDQGADDTTNAVSIRAFFKRVAGVETTTATRAASVIQTRHRIPETPLEPGQILVFQVPIPEPLRFIEPSERETRLMHALEEYGVMHVKLYEDIARHGHIATTYAYPVKVDGRYVMDPSPIPKFDNPKLDMSPALLLFGAGREKRLYAIPPHTRVESLDFEDHPFEIQRWDERCALCDSAESFLDEVITDDAGGRMFVCSDTDYCERRREESA--------------------------------------------------------------------------------------------------------------------------…
	phnK	Putative phosphonates utilization ATP-binding protein PhnK	MSRPDLPGSQCPEAEPGSALRRPDLARPVLLDVQEVTRLYGPGKGCEAVDFRLHVGEVLGIVGESGSGKSTLLRVLAGLEAPDAGRVVYHRPGDSLETDLYAIGEARRRALLRLEWGLVHQNPRDGLRMGVSAGANVGERLMALGQRHYGRLRAAGQDWMTQVELDPARIDDAPRTFSGGMQQRLQIARTLVTRPRLVFMDEPTGGLDVSVQARLLDMLRTLVRQLGLSMVLVTHDLAVARLLAHRLLVMRRGRVVEAGLTDQILDDPQHAYTQLLVSSVLTP--------------------------------------------------------------------------------------------------------------------…
	phnL	Alpha-D-ribose 1-methylphosphonate 5-triphosphate synthase subunit PhnL	MTPILTVEGLGKGFVLHGQGGLALTVMRDLALDLRRGECLVLAGPSGIGKSTLLKILYGNYLAGEGRIRLHFSDGPMELGKLPAHAWHALRRDVIGYVSQFLRVVPRVSTCEVVMEPLLARGADAVESRYRAETLLARLNLPERLWSLPPGTFSGGEQQRVNIARGFIGEHPLLLLDEPTASLDAANRAVVIELIREAKARGAAMLGIFHDEDVRERVADRLLPLENYMDDPSRARIDASQLLQENDHA------------------------------------------------------------------------------------------------------------------------------------------------------…
	phnM	Alpha-D-ribose 1-methylphosphonate 5-triphosphate diphosphatase	MREQILSNARLVLDDEVVTGSLVIRDGRIAGLDIAPSRHPAAIDCDGDYLLPGLVELHTDNMEKYFQPRPKVAWPARQAALAHDAQMAASGITTVFDAVAIGDVNKQSMRHQALAEMCRAIDDIVDGGLARVDHRLHLRCEVSQAETLERFRELADLPRLGLVSLMDHTPGQRQFVSFEAYSTYYQGKYGLSDSELETFVTQQRASSARYSAQHRRAIAAECHSRGLALASHDDATLEHVAESREYGTRVAEFPTTLEAAEASHRAGMAVMMGAPNVVRGGSHSGNIAAADLVARGVLDVLSSDYYPAALLDAVFRIARMEGGYSLPRAVATASRIPAEAVGLTDRGRLAAGARADLIRARLCDDHPLVERVWSAGRQVH-------------------…
	phnN	Ribose 1,5-bisphosphate phosphokinase PhnN	MAGLGEAGRLVYVMGASGVGKDSLLRAARRRHPQWPVAHRYITRKSEASEDCVSLSREEFTWRRQAGLFCLDWQAHGLDYALGIEVEAWLERGMTVLVNGSRHALARAEARFSRQLRPVLVSARPEVLYERLMSRGRENSTEIEARLARHRRLDQACLGVHRLDNSGALATTVAALDAWLTEECMS---------------------------------------------------------------------------------------------------------------------------------------------------------------------------------------------------------------------…
	phnP	Phosphoribosyl 1,2-cyclic phosphodiesterase	MRLRFVGTGDSAQVPRFGCDCAACERARVLSCHRRGPCCAEVRVDGHRYLLDAGRMDLAESCERERPAAILLTHYHADHVQGLFHLRWGTGEPIPVYGPKDAHGCADLFKHSGVLDFQPGLKPFRPLRLVGCEVIPVPLTHSKPTLGFCLDDGGTRLAYLTDTCGLPVETDRFLRDWRPDVVVLDATYPGSHAEPRNHNTVPMALEILERLAPRQAWLTHLGHEVDAELMSVTLALPPNVALAQDGLEADLCAAQAWTA--------------------------------------------------------------------------------------------------------------------------------------------…
ectoine and glycine betaine synthesis	betA	Choline dehydrogenase	MSQIREFDYVIIGAGSAGNVLATRLTEDPAVSVLLLEAGGPDYRFDFRTQMPAALAFPLQGKRYNWAFETDPEPHMNGRRMECGRGKGLGGSSLINGMCYIRGNALDYDNWASMAGLEDWRYADCLPYFRKAECRDIGANAYHGGDGPVSVTTPKEGNNELYRAFVDAGVQAGYPETEDVNGYQQEGFGPMDRFVTPKGRRASTARGYLDQAKQRDNLTIETHATTDVIEFEGKRAVGVRYLRRGQPHRVHARREVLLCAGAIASPQILLRSGVGNPEHLREFDIPVVHDLPGVGENLQDHLEMYIQYECKQPITLYPALKWFNQPKIGAEWLFLGSGIGASNQFESCAFIRTHDEEPWPNLQYHFLPIAISYNGKSAVQAHGFQAHVGSMRSESRGRI…
	betB	Betaine aldehyde dehydrogenase	MTAYNTEPLFIAGRREPATSGETFDVINPYDGSLLAKVEQASQADIDRAVAAAREGQRHWAALTGMQRARILNRAVALLRERNDELAELETRNTGKPISETATVDIVTGADVLEYYAGLAPAIEGAQIPLRESSFVYTRREPLGVIAAIGAWNYPIQIACWKAAPALAAGNAVVFKPSEVTPLTAMKLAEIFTEAGLPDGVFNVVHGDGRVGRMLTEHEDIAKVSFTGEVGTGKKVMSAAGGSTLKDVTMELGGKSPLVVFADADLDRAADAAMMANFYSSGQICTNGTRVFVERSVKQAFEEKIVARVARIRAGDPLDPSVNFGPLVSFEHQAKVLDYIEYGKQDGARVLIGGEPLAEGDFAHGAWAPATVFTDCSDDMRIVREEIFGPVMSILVFDD…
	ectA	L-2,4-diaminobutyric acid acetyltransferase	MNVTPQPFTPSADLARPSVADAVVGSDASPLFIRKPNPDDGWGIYELVKSCPPLDVNSAYAYLLLATQFRNTCAVATDEEGEIVGFVSGYVKSNAPDTYFLWQVAVGEKARGTGLARRLVEAVMSRPELAEVHHLETTITPDNQASWGLFRRLADRWQAPLNSREYFSTDQLGGEHDPENLVRIGPFDTRRI---------------------------------------------------------------------------------------------------------------------------------------------------------------------------------------------------------------…
	ectB	Diaminobutyrate-2-oxoglutarate transaminase	MQTQTLERLESNVRTYSRSFPVVFTKAKNARLTDEEGREYIDFLAGAGTLNYGHNNPHLKQALLDYLDSDGIVHGLDFWTAAKRDYLETLEEVILKPRGLEYKVHLPGPTGTNAVEAAIRLARVAQGRHNIVTFTNGFHGVTMGALATTGNRKFREATGGIPLQGSAFMPYDGYLGKNADSLDYFEKLLGDNSSGLDLPAAVIVETVQGEGGINVAGLEWLKRLERICRDNDILLIVDDIQAGCGRTGKFFSFEHAGIKPDIVTNSKSLSGFGLPFAHVLMRPDLDKWKPGQYNGTFRGFNLAFATAAAAMRQYWRDDTFERDVQRKGRVVEDRFQKIAAWISEQGVPASERGRGLMRGIDVGSGELADKITAKAFEKGLVIETSGQAGEVVKCLCPLT…
	ectC	L-ectoine synthase	MIVRNLEEARKTDRLVKSESGTWDSTRLVLANDGGGFSFHITRIYEGTETHIHYKHHYESVYCIEGEGEVETLADGKIWPIKPGDIYILDQHDEHLLRAHKTMHLACVFTPPITGKEVHREDGSYAPPDEI----------------------------------------------------------------------------------------------------------------------------------------------------------------------------------------------------------------------------------------------------------------------------…
arsenical oxidation, reduction and resistance related genes	arxA	Anaerobic arsenite oxidase ArxA	MKMILDTLLNRRRFLKATGATGAAAATTAGVGKLAGFTAASTTSTHVNARPGGETRVTKNICHQCPARCGINVYTTNGRVHAIYGDPGNPIANGKLCPKGHLGTQLLYDPDRFKGPMKRTNPNKGRDEDPEFVPISWDEAFDIVAERLNRLRERGESHRFAHFYGRGWGSSDAGLYGDFGKLYGTPNSAIGHASMCAEGSKRAKRATDGNDSYNSYDYRNTNYILNFGAGFLEAFRPYNYLMQVWGHMRTKSPKTRVTTIDVRMNPTMAASDRALMIKPGTDGALALAIAHVILTEGLWDKEFVGDFEDGRNHFRTGETIIPDAFQANWTHGLAEWWNGELKDRTPEWAEEITTIPAKHIYTVAREFATTRPAMAIMERGPTAHFNGTYNGMAVHALNA…
	AioA	Arsenite oxidase large subunit	MSQFKDRIPLPPVNAQKTNMACHFCIVGCGYHVYKWPANQEGGRAANQNALGLDFTQQLPAMQLTMTPAMVNRIQEHDGREYSIMIVPDKECSVNKGLSSTRGGQMASVMYSKGTPISERRLKYPMIYTGDDWSDTHWEHAMALYAGLTQRILDNDGPDQLFFNLFDHGGAGGGFENTWATGKLIFDGIQSKMVRIHNRPAYNSECHASRDMGIGELNNSYEDAEVADVIFSIGGNSYETQSNWFLAHWEPNLSGSNIAKKREWFPGESVSKGKVILVDPRRTPTVAICDTIAGKENVLHLAIQPGTDTALFNGLLTHVVDQGWQDQAFIDEHTSGFEEMLVANRMGLDECSRITGVSRADIVKAAEWAYKPKASGHAPRTMHAYEKGVIWGNDNYRIQ…
	AioB	Arsenite oxidase small subunit	MTRLSRRTFLKLTGSSAALGTLSLAPITQAQQGNPSTAGNTNLPYPNEVIARLSELTVNQPLYFTYPDIHSPCVVIRRDREVKGGVGPNKDVVAFSTQCTHMGCPVSYDQETETFKCPCHYSIFDPDNIGQMVIGQATENLPRIILEYDEAEDALRAVSIDGLIYGRQANII-----------------------------------------------------------------------------------------------------------------------------------------------------------------------------------------------------------------------------------…
	Acr3	Arsenical-resistance protein	MSARQDITSPTTAEGMGLFERYLTLWVALAIVAGILLGQLLPAVPETLSRFEVAQVSIPVAVLIWAMIFPMMAQIDFTSLLGVRRQPKGLIITTSVNWLIKPFTMFAISWFFLMVVFRPLIPAELASQYLAGAILLGAAPCTAMVFVWSYLTRGDAAYTLVQVALNDLIMLFAFAPIVVFLLGISNIQVPWDTVALSVVLYIVIPLTAGYITRQTLIKKRGAEWYDNVFMKRVGPITPIGLIITLVLLFAFQGEVILNNPLHIVLIAIPLIIQTFLIFFIAYGWAKAWRVPHNVAAPGAMVGASNFFELAVAAAIALFGLQSGAALATVVGVLVEVPLMLVLVRIANKTRHHFPAENIQ----------------------------------------…
	ArsC	Arsenate reductase	MLPQIYHNPNCGTSRNTLAMMRASGEPPEIIEYLNTPPSRERIVELLAKMGICPRDLLRRKGTPYEALGLDDPALTDDQLIDAMLAEPILINRPIVVTLKGARLCRPSETVLDLLDHPVAHFIKEDGEVIHYPGIAP----------------------------------------------------------------------------------------------------------------------------------------------------------------------------------------------------------------------------------------------------------------------…
	ArsR1	Arsenic resistance transcriptional regulator	MDINTVLSALANPARLDILYWLKEPERHFPPQKDTAPKGGVCVSHIRDKTGLSQPTVSLYLSTLYRAGLVSSTRVGQWTYYRYEHDVAESFLHELSERL------------------------------------------------------------------------------------------------------------------------------------------------------------------------------------------------------------------------------------------------------------------------------------------------------------…
	ArsH	Arsenical resistance operon protein ArsH	MKDIKMPADLPNIDPSQLRSIDTTLLAGPETPQHAPRILVLYGSLRERSYSRFVAEEAGRLLRWFGCEVRTYNPSGLPLPDDAGADHPKVQELRELAEWSEGMLWVSPERHGAMTAIMKAQIDWIPLSLGGIRPTQGKTLAVIQVSGGSQSFNAVNQMRILGRWMRMVTIPNQSSVPKAFNEFDEDGRMKPSPLYLRIVDVCEELTKFTLMIRGRSDYLTDRYSERVESAEDVSRRVNQCAI-------------------------------------------------------------------------------------------------------------------------------------------------------------…
